# Supplementary material
Source: PubMed Central journal article supplement (PMC3923990)
Supplement: NIHMS550403-supplement-1_si_001.pdf [file NIHMS550403-supplement-1_si_001.pdf]

## Supporting information

# X-Ray Photoelectron Spectroscopy Investigation of the Nitrogen Species in Photoactive Perfluorophenylazide-Modified Surfaces

*Gilad Zorn<sup>1§\*</sup>, Li-Hong Liu<sup>2†</sup>, Líney Árnadóttir<sup>1#</sup>, Hui Wang<sup>2‡</sup>, Lara J. Gamble<sup>1</sup>, David G. Castner<sup>1\*</sup>, Mingdi Yan<sup>2‡\*</sup>*

<sup>1</sup> National ESCA and Surface Analysis Center for Biomedical Problems, Departments of Bioengineering and Chemical Engineering, University of Washington, Box 351653, Seattle, WA 98195-1653

<sup>2</sup> Department of Chemistry, Portland State University, P.O. Box 751, Portland, OR 97207-0751

Present addresses:

<sup>§</sup> General Electric Global Research, One Research Circle, Niskayuna, NY 12309

<sup>†</sup> Department of Materials Science and Engineering, University of Texas at Dallas, Richardson, TX 75080

<sup>#</sup> School of Chemical, Biological and Environmental Engineering, Oregon State University, Corvallis, OR 97331

<sup>‡</sup> Department of Chemistry, University of Massachusetts Lowell, One University Ave., Lowell, MA 01854

\* Corresponding authors: G.Z. e-mail, zorn@ge.com; phone, +1 518 387-7118

D.G.C. e-mail, castner@uw.edu; phone, +1 206 543-8094

M.Y. e-mail, Mingdi\_Yan@uml.edu; phone, +1 978-934-3647

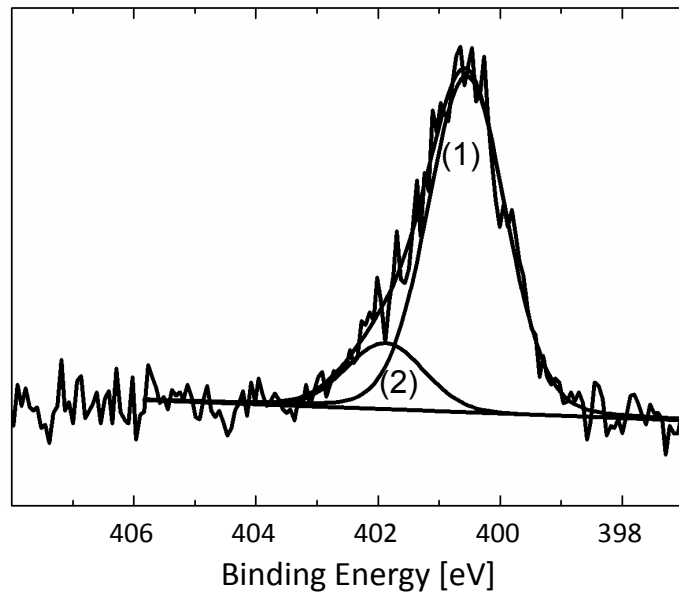

**Figure S1:** High-resolution XPS N1s core level spectrum of a silicon wafer functionalized with a 1:10 mixture of PFPA-silane:PFB-silane. This spectrum exhibits two peaks: (1) at 400.5 eV and (2) at 402.1 eV, see also table 3.

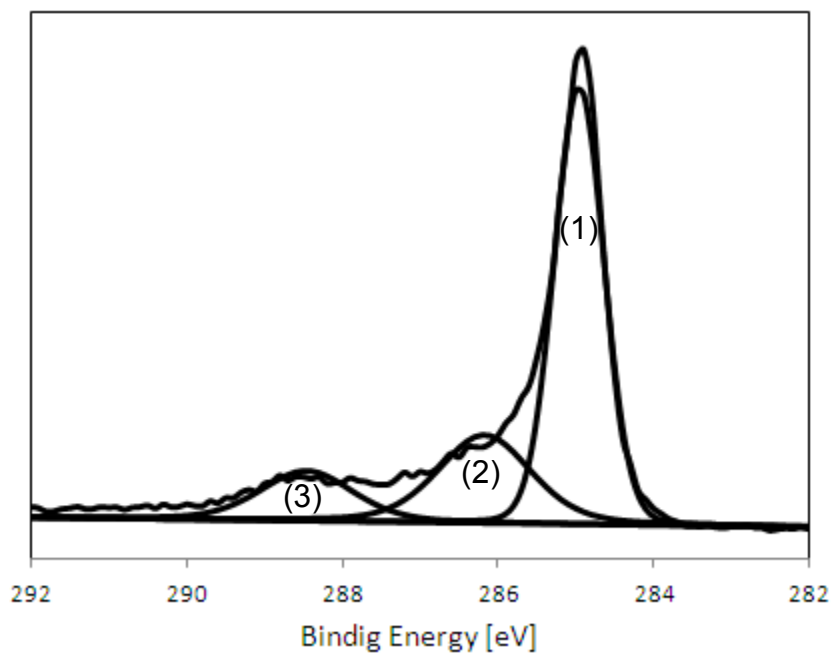

**Figure S2:** High-resolution XPS C1s core level spectrum of graphene attached to PFPA-functionalized silicon wafer surface. This spectrum exhibits three peaks: (1) at 285.0 eV, (2) at 286.6 eV and (3) at 288.2 eV.

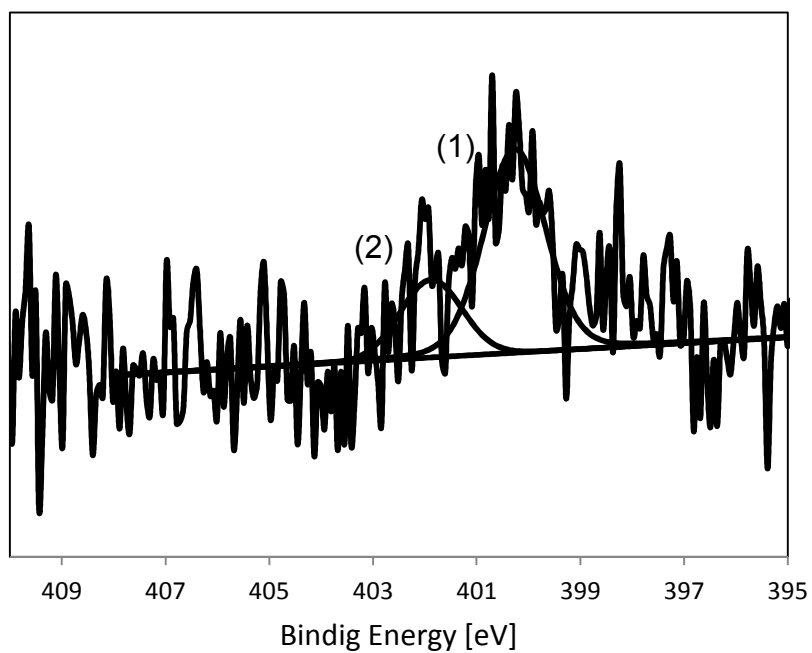

**Figure S3:** High-resolution XPS N1s core level spectrum of PFPA-functionalized gold surface that was exposed to UV irradiation in the absence of graphene. This spectrum exhibits two peaks: (1) at 400.5 eV and (2) at 402.1 eV.

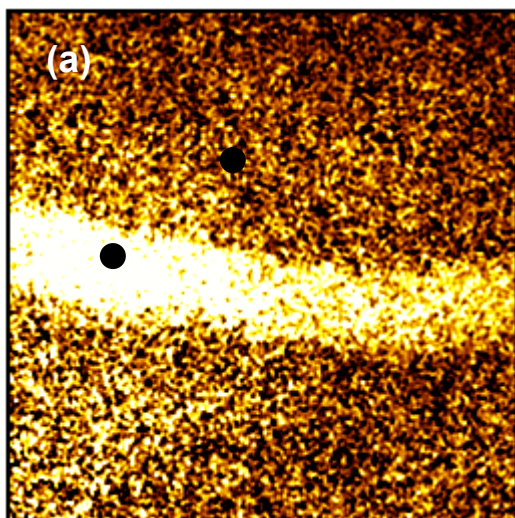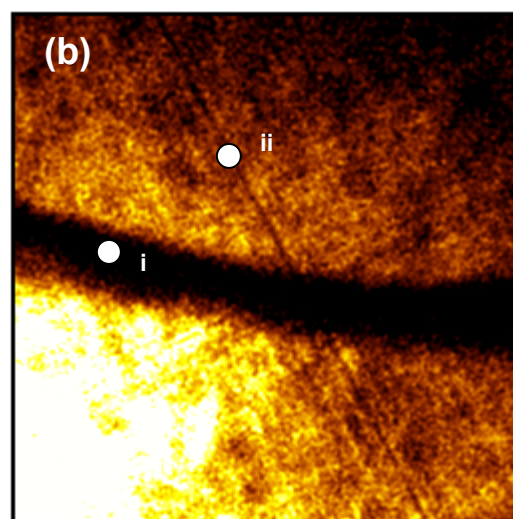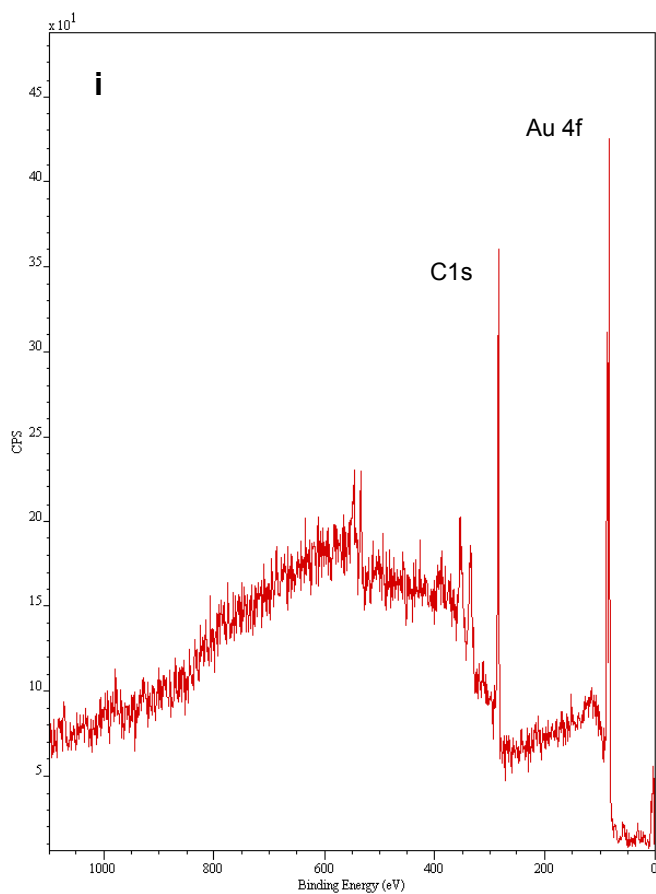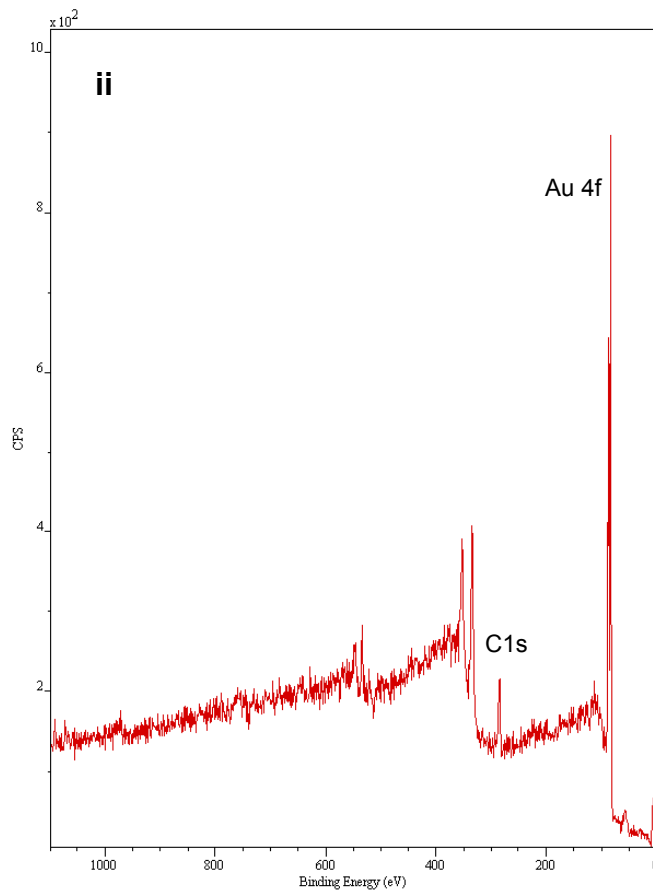

**Figure S4.** XPS background corrected images of patterned graphene on a PFPA-functionalized gold: (a) C1s image, (b) Au4f image. Image size: 400  $\mu\text{m}$   $\times$  400  $\mu\text{m}$ . Spots marked i and ii are the areas selected for small spot analyses (see corresponding spectra)
